# Supplementary material
Source: bioRxiv or medRxiv preprint supplement (https://www.biorxiv.org/highwire/filestream/25032/field_highwire_adjunct_files/0/070797-1.pdf)
Supplement: Supplementary file [file 070797-1.pdf]

## 1 Supplemental materials

### 2 Table S1 – Population names and abbreviations

| <b>Population</b>                                                 | <b>Code</b> | <b>Super population</b> | <b>N</b> |
|-------------------------------------------------------------------|-------------|-------------------------|----------|
| Esan in Nigeria                                                   | ESN         | AFR                     | 99       |
| Gambian in Western Division, Mandinka                             | GWD         | AFR                     | 113      |
| Luhya in Webuye, Kenya                                            | LWK         | AFR                     | 99       |
| Mende in Sierra Leone                                             | MSL         | AFR                     | 85       |
| Yoruba in Ibadan, Nigeria                                         | YRI         | AFR                     | 108      |
| African Caribbean in Barbados                                     | ACB         | AFR/AMR                 | 96       |
| People with African Ancestry in Southwest USA                     | ASW         | AFR/AMR                 | 61       |
| Colombians in Medellin, Colombia                                  | CLM         | AMR                     | 94       |
| People with Mexican Ancestry in Los Angeles, CA, USA              | MXL         | AMR                     | 64       |
| Peruvians in Lima, Peru                                           | PEL         | AMR                     | 85       |
| Puerto Ricans in Puerto Rico                                      | PUR         | AMR                     | 104      |
| Chinese Dai in Xishuangbanna, China                               | CDX         | EAS                     | 93       |
| Han Chinese in Beijing, China                                     | CDX         | EAS                     | 103      |
| Southern Han Chinese                                              | CHS         | EAS                     | 105      |
| Japanese in Tokyo, Japan                                          | JPT         | EAS                     | 104      |
| Kinh in Ho Chi Minh City, Vietnam                                 | KHV         | EAS                     | 99       |
| Utah residents (CEPH) with Northern and Western European ancestry | CEU         | EUR                     | 99       |
| British in England and Scotland                                   | GBR         | EUR                     | 91       |
| Finnish in Finland                                                | FIN         | EUR                     | 99       |
| Iberian Populations in Spain                                      | IBS         | EUR                     | 107      |
| Toscani in Italia                                                 | TSI         | EUR                     | 107      |
| Bengali in Bangladesh                                             | BEB         | SAS                     | 86       |
| Gujarati Indians in Houston, TX, USA                              | GIH         | SAS                     | 103      |
| Indian Telugu in the UK                                           | ITU         | SAS                     | 102      |
| Punjabi in Lahore, Pakistan                                       | PJL         | SAS                     | 96       |
| Sri Lankan Tamil in the UK                                        | STU         | SAS                     | 102      |

3

4

5 **Table S2** – Three-way admixture proportions between recently admixed populations in  
6 the Americas. Values are computed at K=3 on common autosomal SNPs using  
7 ADMIXTURE with mean percentages  $\pm$  standard deviations.

|     | AFR           | EUR           | NAT           |
|-----|---------------|---------------|---------------|
| ACB | 88.0% (7.7%)  | 11.7% (7.3%)  | 0.3% (1.1%)   |
| ASW | 75.6% (13.8%) | 21.3% (9.1%)  | 3.1% (9.2%)   |
| CLM | 7.8% (13.8%)  | 66.6% (12.8%) | 25.7% (9.3%)  |
| MXL | 4.3% (2.2%)   | 48.7% (18.6%) | 47.0% (19.1%) |
| PEL | 2.5% (5.4%)   | 20.2% (12.0%) | 77.3% (14.2%) |
| PUR | 13.9% (5.4%)  | 73.2% (10.0%) | 12.9% (3.6%)  |

8  
9 **Table S3** – Comparison of mean ancestry proportions and ratio on chromosome X  
10 versus autosomes across populations. Per Lind et al, proportion X in a population =  
11  $(\text{fraction male} + 2 \times \text{fraction female}) / 1.5$ , and proportion autosome in a population =  
12  $\text{fraction male} + \text{fraction female}$ . P-values are from two-sided t-tests on individual  
13 ancestries (comparisons are not independent as ancestry proportions must sum to one).

|            | Ancestry | ACB    | ASW    | CLM    | MXL    | PEL    | PUR     |
|------------|----------|--------|--------|--------|--------|--------|---------|
| Relative   | AFR      | 4.01   | 0.83   | -2.02  | -20.32 | 50.75  | 12.69   |
| X/autosome | EUR      | -41.73 | -17.41 | -20.20 | -26.60 | -41.51 | -14.51  |
|            | NAT      | 558.04 | 87.41  | 52.70  | 28.49  | 9.37   | 66.89   |
| p-value    | AFR      | 8.9e-2 | 7.7e-1 | 9.8e-1 | 6.8e-2 | 3.5e-1 | 4.1e-1  |
|            | EUR      | 1.0e-3 | 8.9e-2 | 1.4e-7 | 7.9e-4 | 4.5e-6 | 1.5e-7  |
|            | NAT      | 7.2e-9 | 1.1e-1 | 4.0e-9 | 3.9e-4 | 1.3e-3 | 1.4e-10 |

14

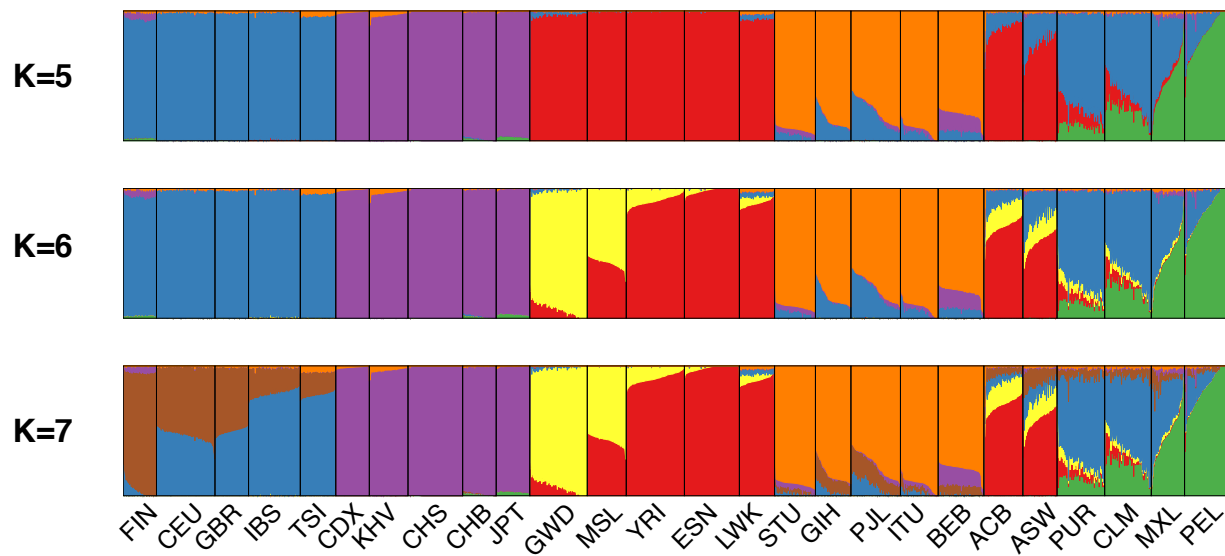

15

16 **Figure S1** – ADMIXTURE analysis at K=5, K=7, and K=8. K=8 has the lowest 10-fold  
17 cross-validation error of K=3-12. At K=5, this analysis separates continental ancestries  
18 in the super populations (AFR, AMR, EAS, EUR, and SAS, population abbreviations in  
19 **Table S1**). These results also highlight sub-continental substructure; for example, there  
20 is detectable substructure resembling European (EUR) and East Asian (EAS)  
21 ancestries in the SAS populations (population means range from 6.1-15.9% and 0.3-  
22 12.2%, respectively), with the highest rates of East Asian-like ancestry in the Bengalis  
23 from Bangladesh (BEB). In contrast, the greatest quantity of European-like ancestry in  
24 the SAS populations is in the Punjabi from Lahore, Pakistan (PJI), who are  
25 geographically the closest to Europe. Ancestral clines have been observed along  
26 geographical, caste, and linguistic axes in more densely sampled studies of South  
27 Asia<sup>1,2</sup>. Increasing the model to K=6 there is also an east-west cline among African  
28 populations, while at K=7 we observe the north-south cline of European ancestry<sup>3</sup>.  
29 While there is minimal Native American ancestry (<1%) in most African Americans

30 across the United States, there is a substantial enrichment in several ASW individuals  
31 from 1000 Genomes (mean of 3.1%, and 9 samples with >5%, including NA19625,  
32 NA19921, NA20299, NA20300, NA20314, NA20316, NA20319, NA20414, and  
33 NA20274)<sup>4,5</sup>. Interestingly, one ASW individual has no African ancestry (NA20314,  
34 EUR= 0.40, NAT=0.59) but is the mother of NA20316 in an ASW duo with few  
35 Mendelian inconsistencies that suggest that the father mostly likely has ~80% African  
36 and ~20% European ancestry, similar to other ASW individuals. We also find evidence  
37 of East Asian admixture in several PEL samples (39% in HG01944, 12% in HG02345,  
38 6% in HG0192, 5% in HG01933, and 5% in HG01948). Consistent with the autosomal  
39 evidence, the Y chromosome haplogroup for HG01944 (Q1a-M120) clusters most  
40 closely with two KHV samples and other East Asians rather than the Q-L54 subgroup  
41 expected in samples from South America<sup>6</sup>.

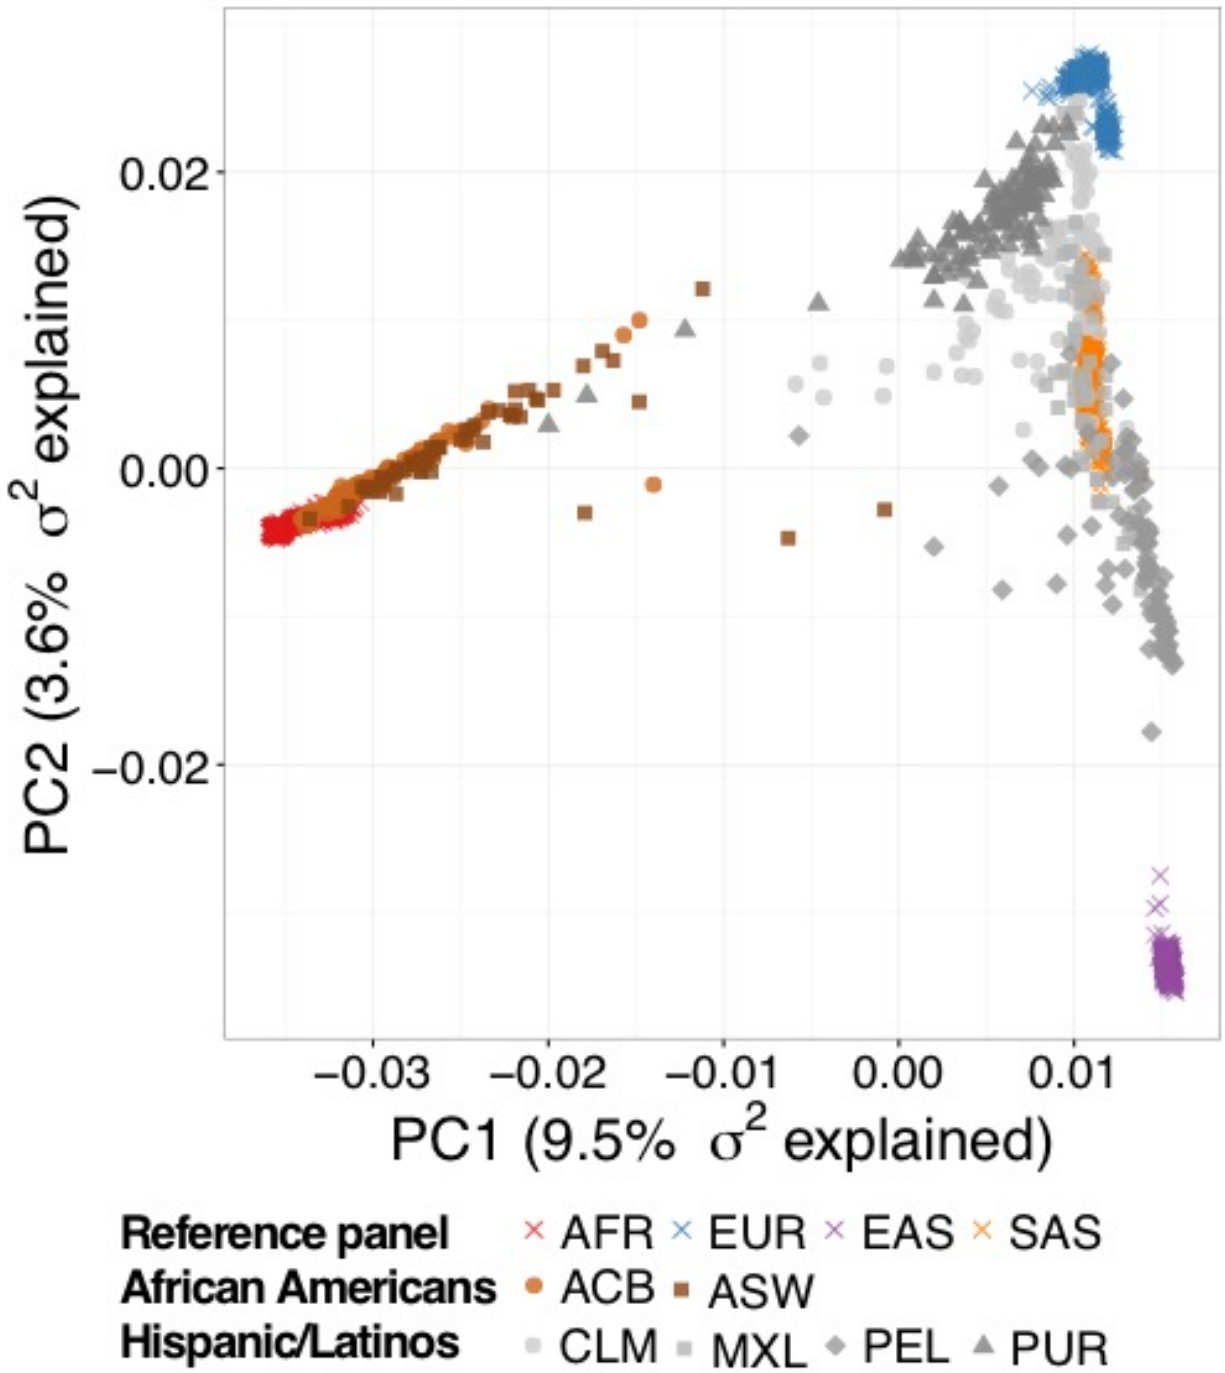

42

43 **Figure S2** – Principal components analysis of all samples showing the relative  
 44 homogeneity of AFR, EUR, EAS, and SAS continental groups and continental mixture  
 45 of admixed samples from the Americas (ACB, ASW, CLM, MXL, PEL, and PUR).

**Admixed panel**

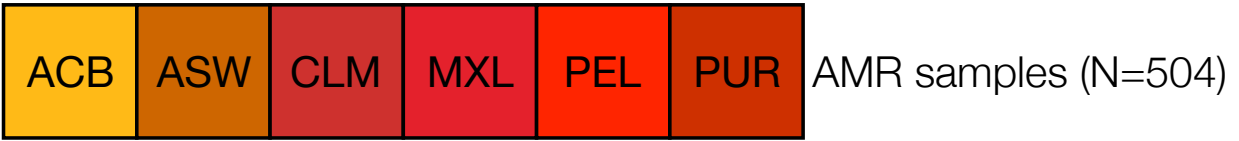

**Reference panel**

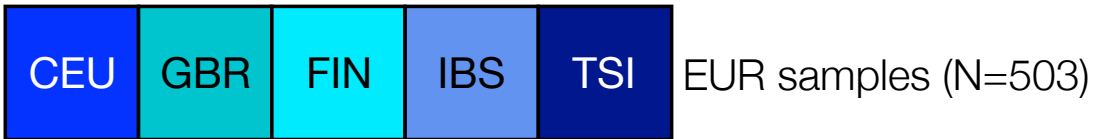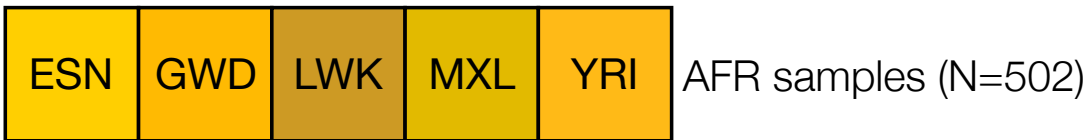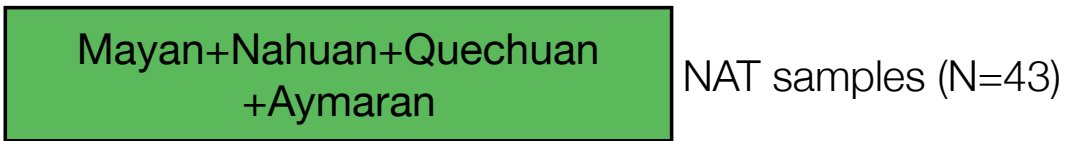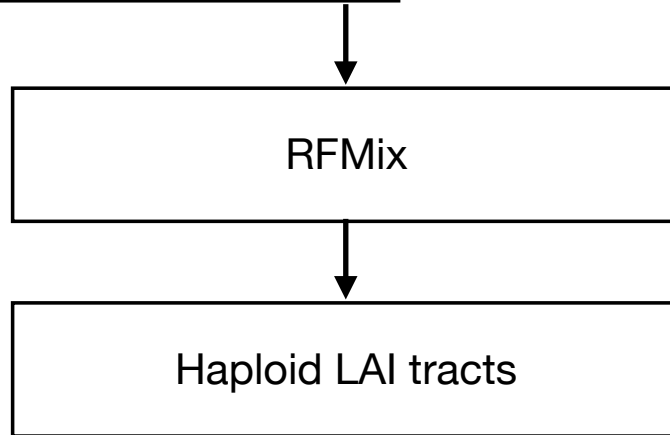

46

47 **Figure S3** – Schema of local ancestry calling pipeline

48

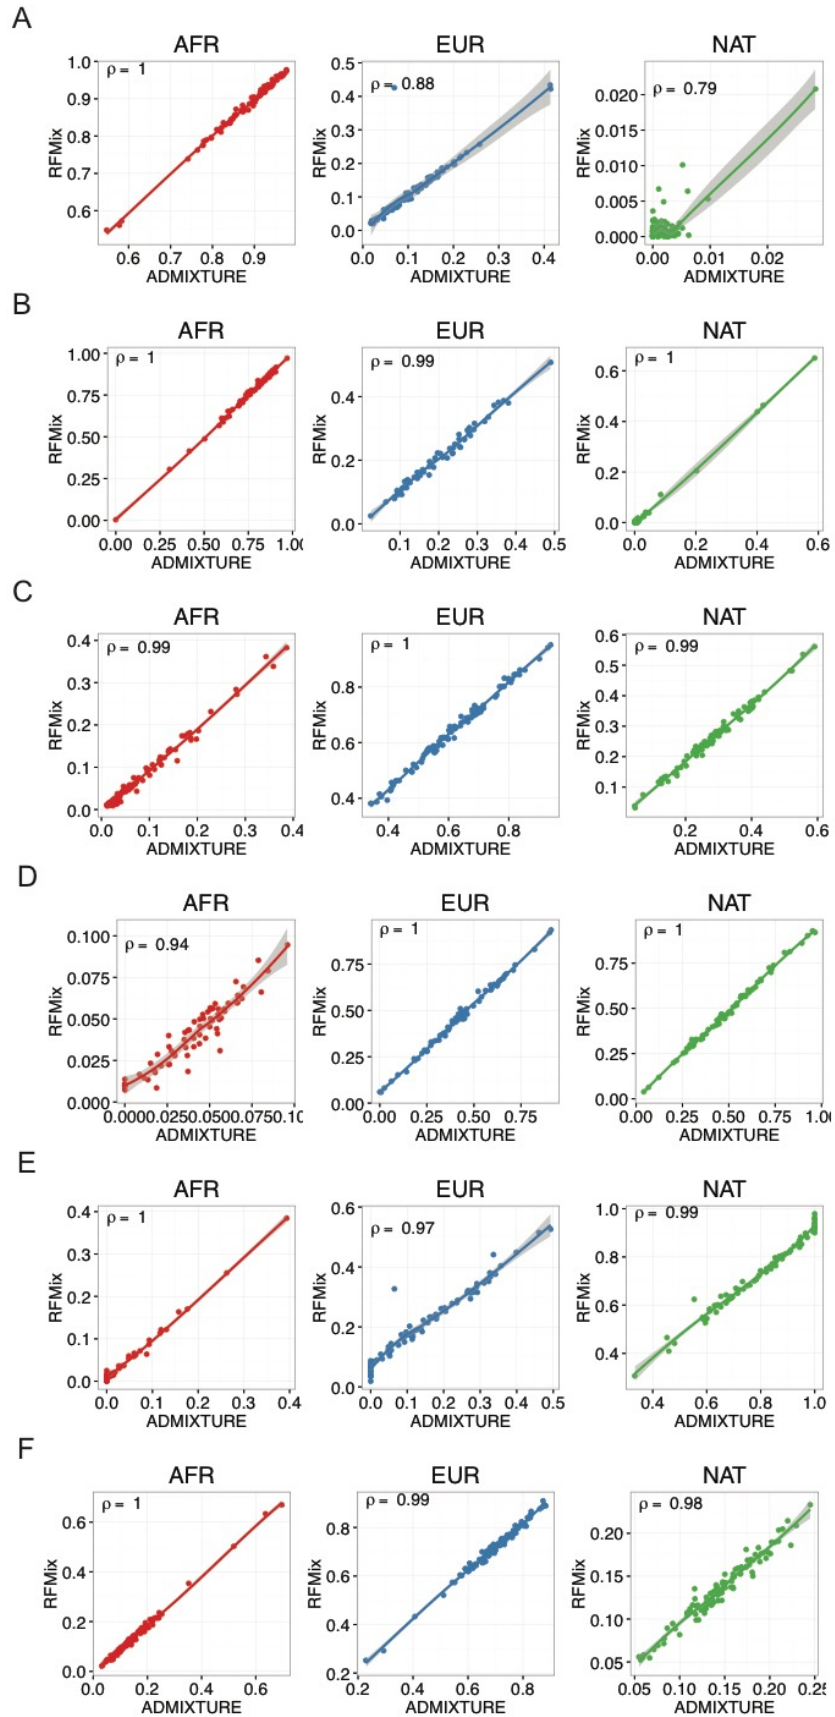

50 **Figure S4** – Concordance between global ancestry estimates across individuals via  
51 Pearson’s correlation from ADMIXTURE at K=5 as in **Figure S1** versus 3-way RFMix  
52 inferences for AFR, EUR, and NAT ancestries. The correlation between ADMIXTURE  
53 and global ancestry estimates from RFMix was lower when there was minimal ancestry  
54 from a given source population and/or tracts were very short (<5 cM), e.g. NAT ancestry  
55 in the ACB ( $\rho=0.79$ ) and AFR ancestry in the MXL ( $\rho=0.94$ ). A) ACB. Substantial  
56 differences occurred in 1 ACB individual, HG01880, where considerable South Asian  
57 ancestry (31.8%) was classified as European ancestry due to limitations of the 3-way  
58 local ancestry reference panel. B) ASW. C) CLM. D) MXL. E) PEL. Substantial  
59 differences occurred in 2 PEL individuals, HG01944 and HG02345, where considerable  
60 East Asian ancestry (38.2% and 12.3%, respectively) was classified in RFMix as EUR  
61 and NAT ancestry due to limitations of the 3-way local ancestry reference panel. F)  
62 PUR.  
63



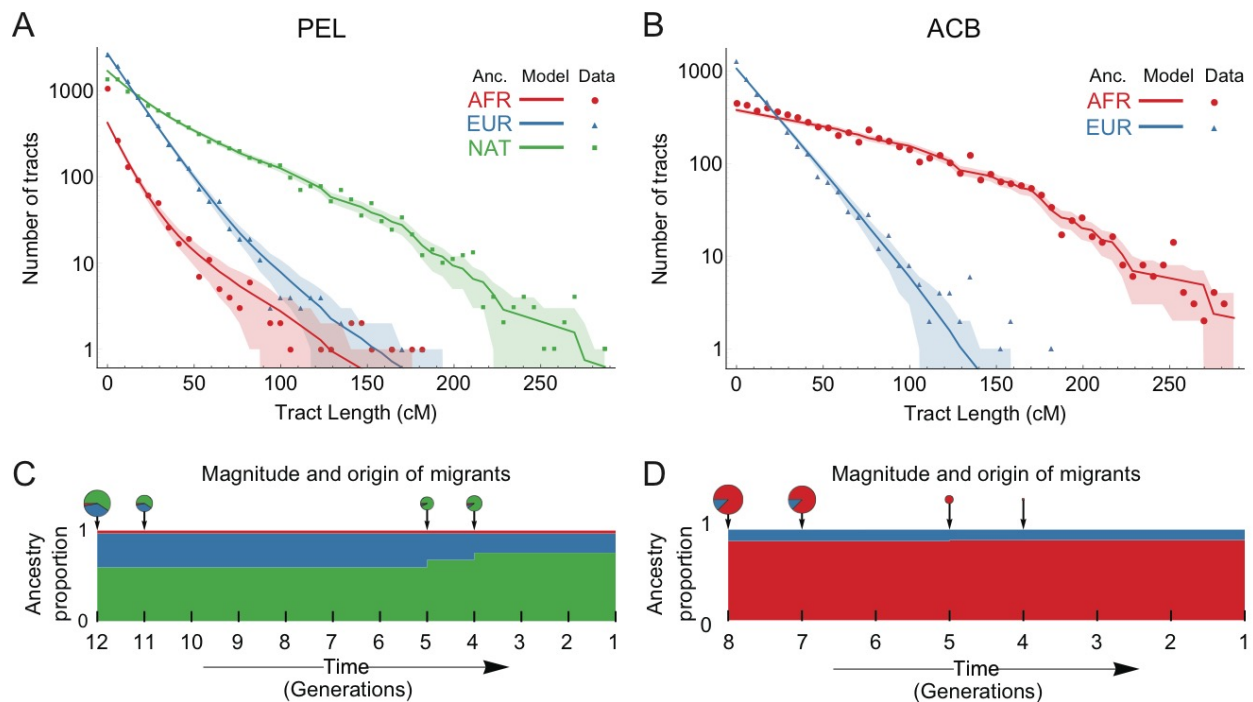

64

65 **Figure S5** – Demographic reconstruction through genetically dated recent admixture  
 66 events in the Americas. A-B) Local ancestry tract length decay of AFR, EUR, and NAT  
 67 continental ancestry tracts for the A) PEL and B) ACB. Points represent the observed  
 68 distribution of ancestry tracts, and solid lines represent the distribution of the best-fit  
 69 Markov model inferred using *Tracts*, with the shaded areas indicating one standard  
 70 deviation confidence intervals. C-D) Admixture time estimates in number of generations  
 71 ago, relative quantity of migrants, and ancestry proportions over time under the best-  
 72 fitting model for the C) PEL and D) ACB. C) The best-fit model for the PEL begins ~12  
 73 generations ago, which is slightly more recent than for insular and Caribbean mainland  
 74 populations. For example, admixture in Colombian and Honduran mainland populations  
 75 was previously inferred to have begun 14 generations ago, whereas admixture in  
 76 Cuban, Puerto Rican, Dominican, and Haitian populations began 16-17 generations  
 77 ago<sup>7</sup>. There is minimal African ancestry (2.9%), some European ancestry (37.6%) and  
 78 primarily Native ancestry (59.4%) in the first pulse of admixture, followed by a later

79 pulse (~5 generations ago) of primarily Native ancestry (91.1%). This later pulse of  
80 primarily Native ancestry is unique to the PEL compared to other admixed populations  
81 of the Americas<sup>7</sup>. D) The best-fit model for the ACB was an initial pulse of admixture  
82 between Europeans and Africans followed by a later pulse of African ancestry. The best  
83 model indicates that admixture in the ACB began ~8 generations ago with the initial  
84 pulse containing 87.4% African ancestry and 12.6% European ancestry. The second  
85 pulse of African ancestry began ~5 generations ago and had only a minor overall  
86 contribution (4.4% of total pulse ancestry), which is consistent with either a later small  
87 pulse of African ancestry or movement of populations within the Caribbean. The  
88 admixture events we infer in the ACB are more recent than previous ASW and African  
89 American two-pulse models, which estimated that admixture began ~10-11 generations  
90 ago<sup>4,8</sup>. Potential explanations for this small difference include differences in the ages of  
91 individual between the two cohorts and the fact that pulse timings indicate the  
92 generations that admixture most likely spanned rather than the exact generation during  
93 which admixture began<sup>7</sup>.

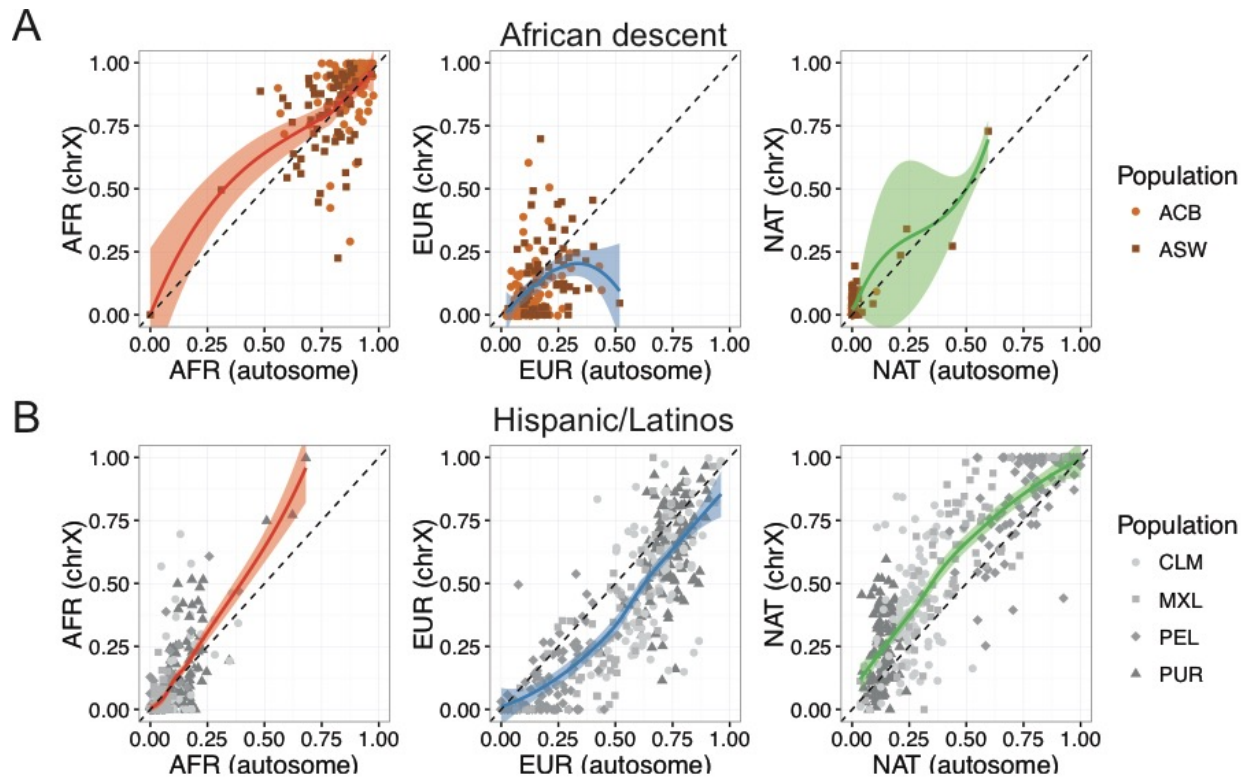

94

95 **Figure S6** – Comparison of ploidy-adjusted ADMIXTURE ancestry estimates obtained  
 96 on the autosomes and X chromosome at K=3 with CEU, YRI, and NAT<sup>9</sup> reference  
 97 samples. 700,093 SNPs on the autosomes and 10,503 SNPs on the X chromosome  
 98 were used to infer ancestry proportions. A) African descent and B) Hispanic/Latino  
 99 samples. Sex-biased admixture has previously been shown to be ubiquitous in the  
 100 Americas, impacting phenotypes strongly correlated with ancestry, such as  
 101 pigmentation<sup>7,10-15</sup>. We inferred sex-biases in admixture events by separately querying  
 102 ploidy-adjusted admixture proportions on the X chromosome versus the autosomes, as  
 103 previously described<sup>10</sup>. We computed 3-way admixture proportions for AMR and  
 104 AFR/AMR via ADMIXTURE<sup>16</sup> and consistently find across all six admixed AMR  
 105 populations that the ratio of European ancestry is significantly depleted on the X  
 106 chromosome compared to the autosomes, indicating a ubiquitous excess of breeding

107 European males in the Americas, as seen previously<sup>4,13,17</sup>; there is also a significant  
 108 excess of Native American ancestry ( $p < 1e-2$ , **Table S3**) on the X chromosome in each  
 109 of the AMR populations ( $p < 1e-4$ ).  
 110

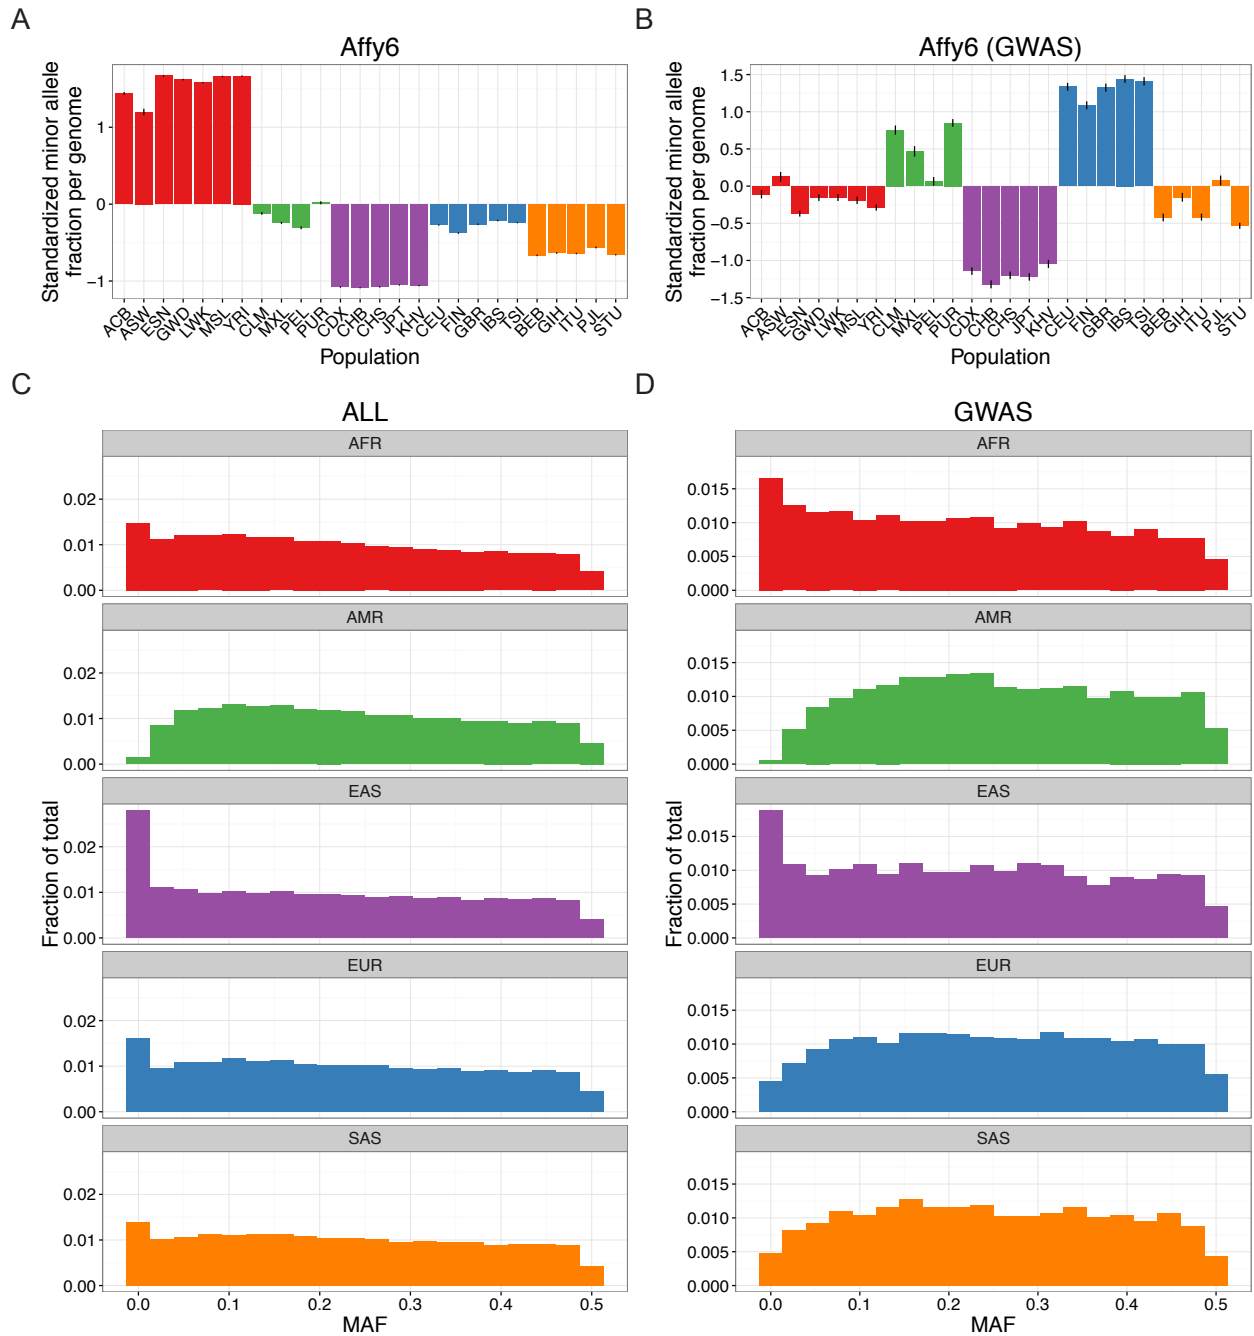

111

112 **Figure S7** – Genetic variation and allele frequencies in global populations across all

113 sites and at GWAS sites. A-B) GWAS study bias in European and American samples  
114 compared at all Affy6 sites from which local ancestry calls were made. All  
115 standardizations are computed as the ratio of minor alleles to total alleles per population  
116 minus the mean ratio across all individuals, then all divided by the standard deviation of  
117 this ratio. Error bars shows the standard error of the mean. A) Standardized across all  
118 Affy6 sites. B) Standardized across the intersection of Affy6 sites and the GWAS  
119 catalog. C-D) Allele frequencies within all super populations. Minor allele frequency  
120 fraction across C) all sites Affy6 sites, and D) the intersection of all Affy6 and GWAS  
121 catalog sites.  
122

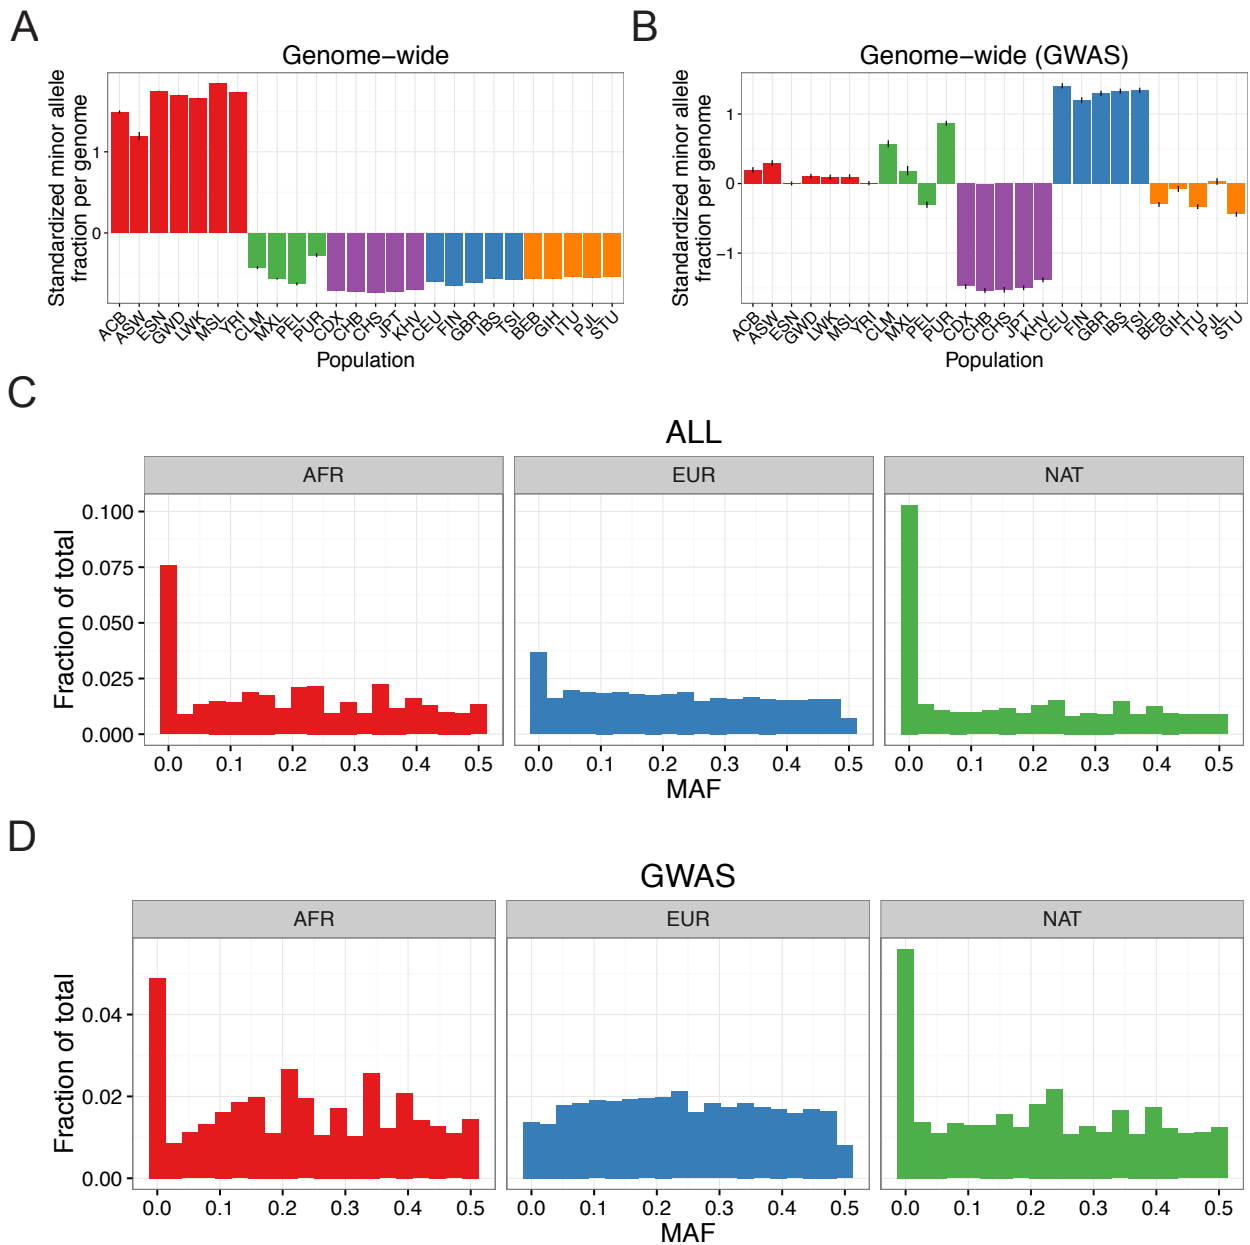

123

124 **Figure S8** – Genetic variation in global and admixed populations across all sites and at  
 125 GWAS sites. A-B) GWAS study bias in European and American samples compared to  
 126 genomic background. All standardizations are computed as the ratio of minor alleles to  
 127 total alleles per population minus the mean ratio across all individuals from all  
 128 populations, then all divided by the standard deviation of this ratio. Error bars shows the  
 129 standard error of the mean. A) Standardized across the whole genome. B) Standardized

130 across all sites from the GWAS catalog. C-D) Allele frequencies in local ancestry calls  
131 from admixed AMR and AFR/AMR samples are specifically enriched on European tracts  
132 and depleted on African and Native American tracts across all genotyped sites and  
133 specifically at GWAS sites. Minor allele frequency fraction across C) all sites in admixed  
134 AFR/AMR and AMR populations stratified by local ancestry tracts, and D) sites from the  
135 GWAS catalog in admixed AFR/AMR and AMR populations stratified by local ancestry  
136 tracts.  
137

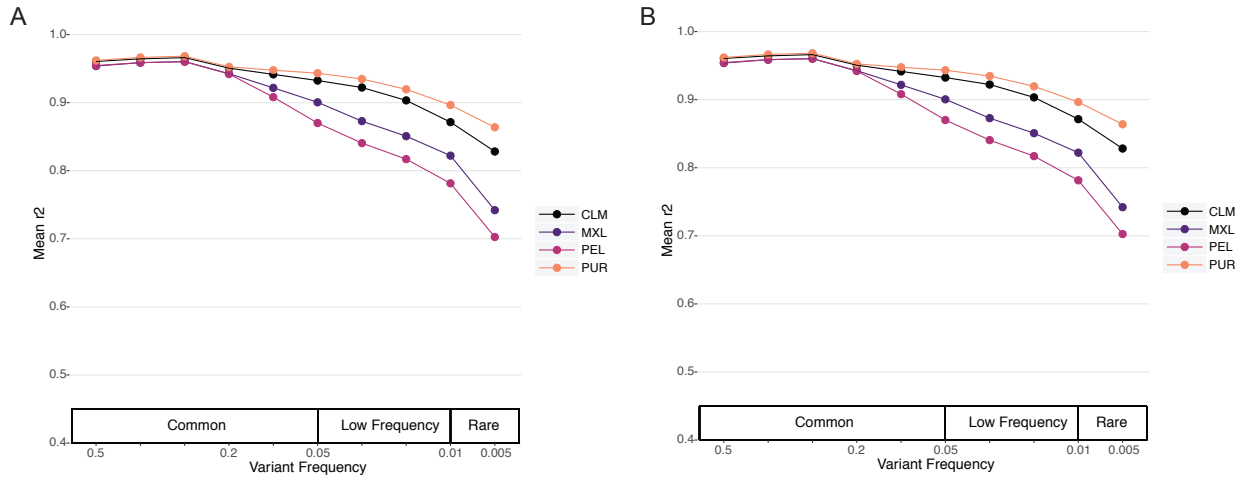

138

139 **Figure S9** – Imputation accuracy by population for chromosome 9. A) Illumina

140 OmniExpress. B) Affymetrix Axiom World Array LAT

141

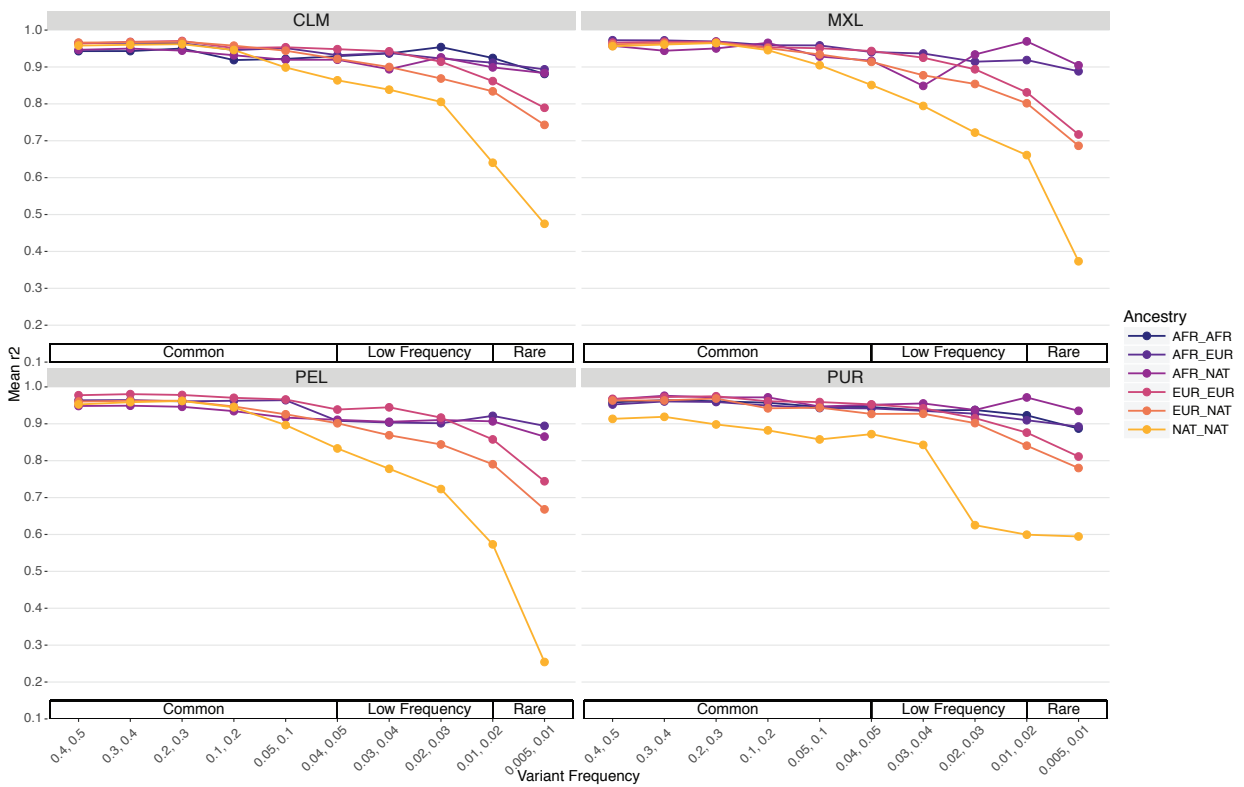

142

143 **Figure S10** – Imputation accuracy by population assessed using a leave-on-out



144 strategy, stratified by diploid local ancestry on chromosome 9 for the Affymetrix Axiom  
145 World Array LAT genotyping array.

146

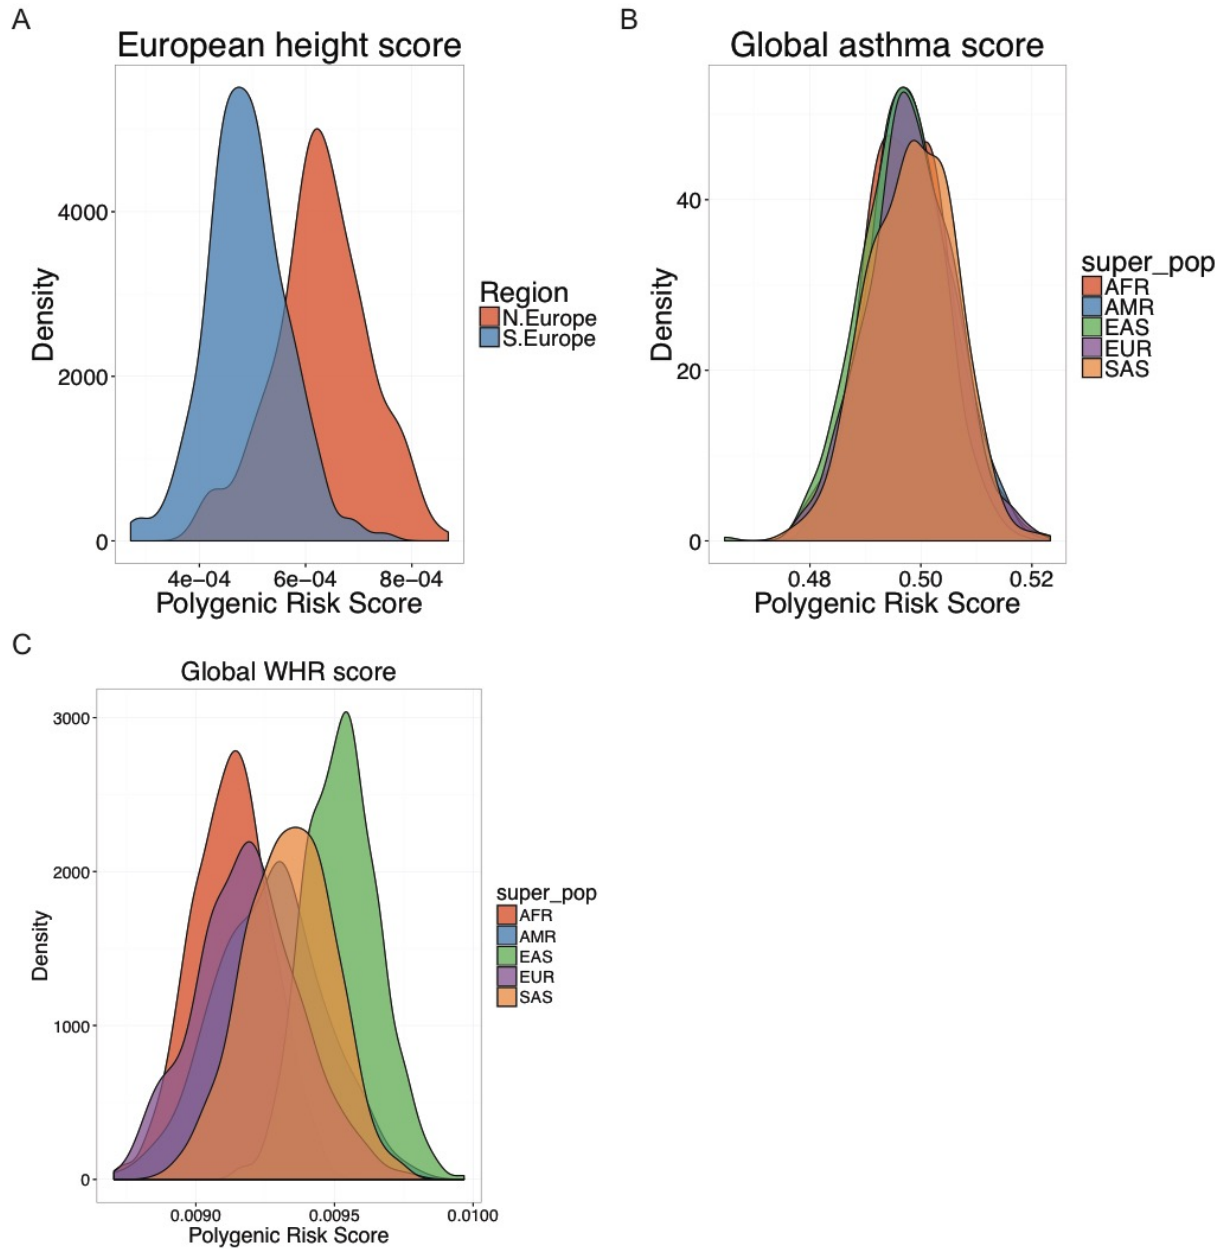

147

148 **Figure S11** – Polygenic risk scores for: A) northern/southern European height, B) waist-  
149 hip ratio, C) asthma.

150

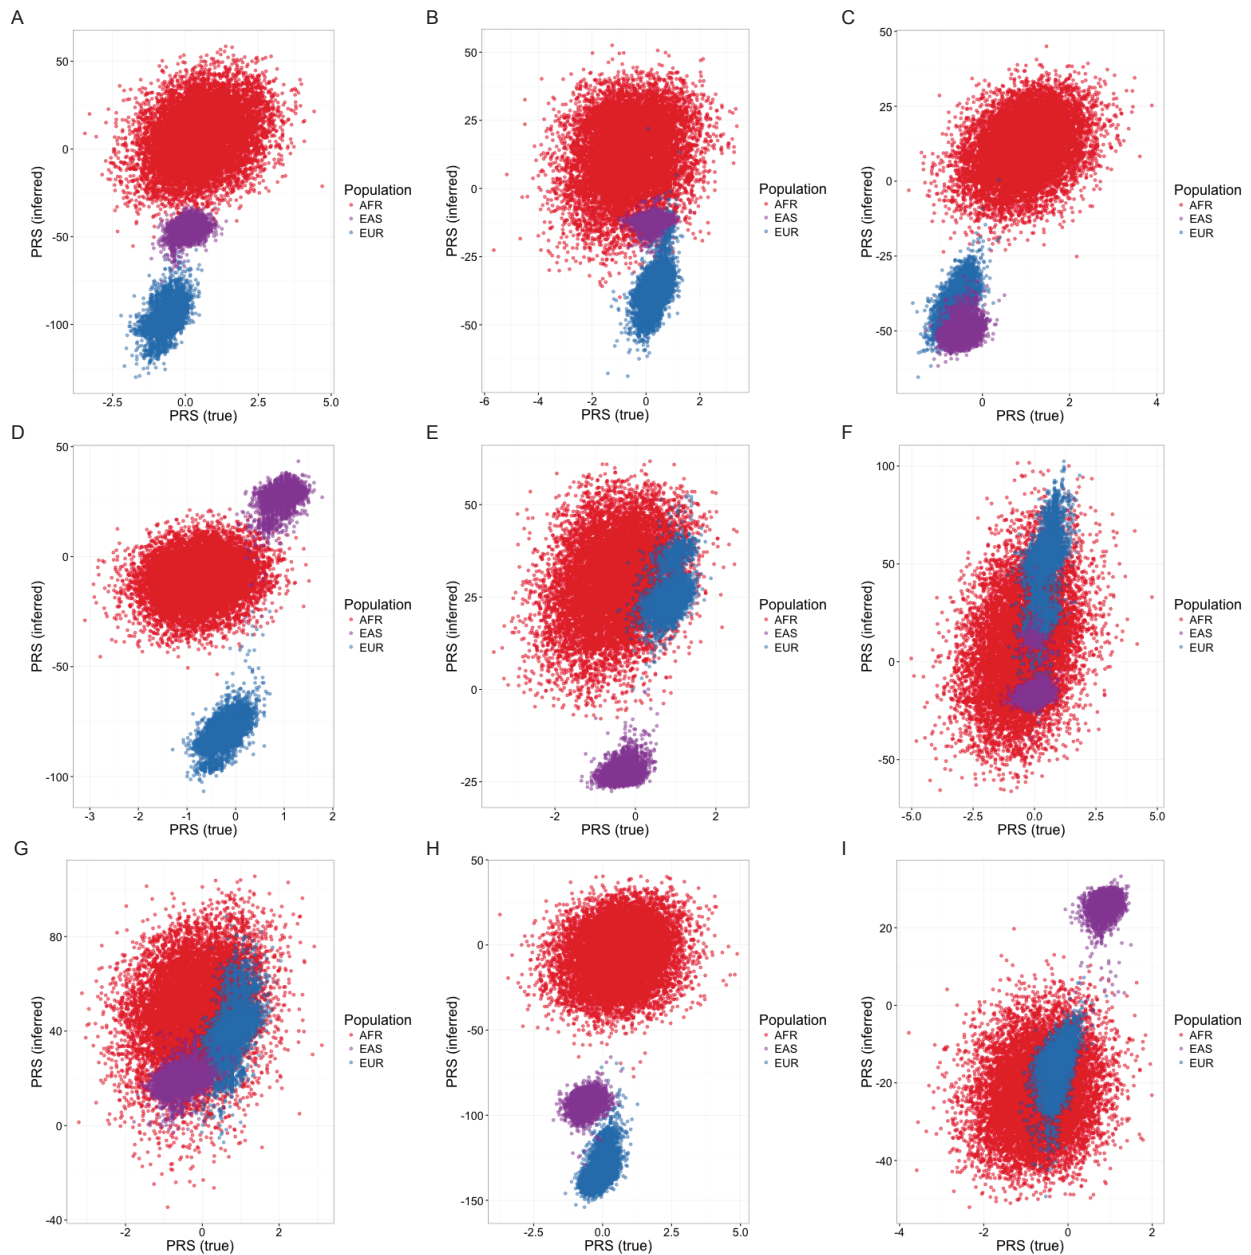

152

153 **Figure S12** – Simulation runs for the same parameter set ( $h^2=0.67$ ,  $m=1000$ ) and same  
 154 causal variants with varying effect sizes resulting in a wide range of possible biases in  
 155 inferred polygenic risk scores across populations.

156

A

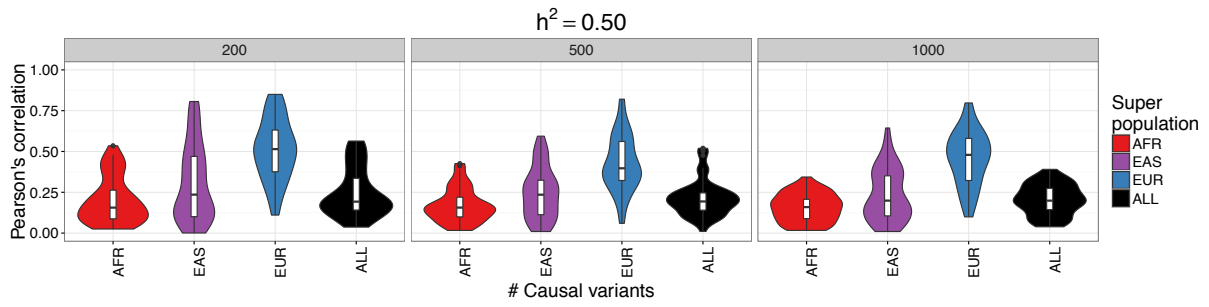

B

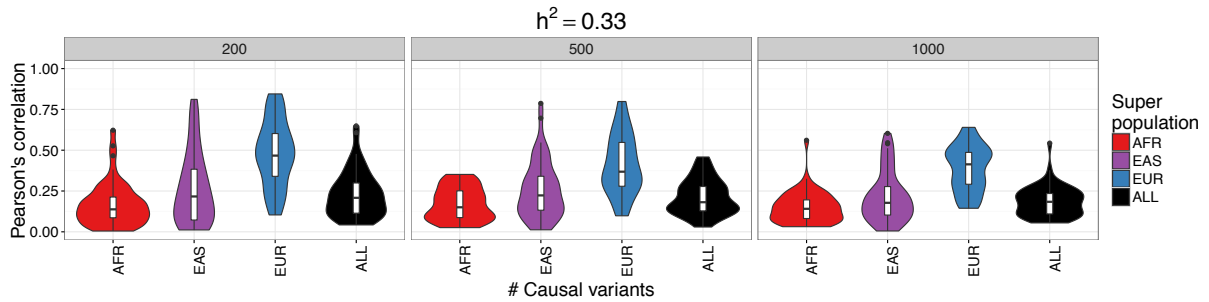

157

158 **Figure S13** - Violin plots show Pearson's correlation across 50 iterations per parameter

159 set between true and inferred polygenic risk scores across differing genetic

160 architectures, including  $m=200, 500,$  and  $1,000$  causal variants and  $h^2=0.67,$  as in

161 Figure 5. The "ALL" population correlations were performed on population mean-

162 centered true and inferred polygenic risk scores.

163

164 **References**

- 165 1. Basu A, Sarkar-Roy N, Majumder PP (2016) Genomic reconstruction of the history of  
166 extant populations of India reveals five distinct ancestral components and a complex  
167 structure. *Proc Natl Acad Sci U S A* 113:1594-1599
- 168 2. Reich D, Thangaraj K, Patterson N, Price AL, Singh L (2009) Reconstructing Indian  
169 population history. *Nature* 461:489-494
- 170 3. Novembre J, Johnson T, Bryc K, Kutalik Z, Boyko AR, Auton A, Indap A, King KS,  
171 Bergmann S, Nelson MR, et al (2008) Genes mirror geography within Europe. *Nature*  
172 456:98-101
- 173 4. Baharian S, Barakatt M, Gignoux CR, Shringarpure S, Errington J, Blot WJ,  
174 Bustamante CD, Kenny EE, Williams SM, Aldrich MC, et al (2016) The Great Migration  
175 and African-American Genomic Diversity. *PLoS genetics* 12:e1006059
- 176 5. Mimno D, Blei DM, Engelhardt BE (2015) Posterior predictive checks to quantify lack-  
177 of-fit in admixture models of latent population structure. *Proc Natl Acad Sci U S A*  
178 112:E3441-E3450
- 179 6. Poznik GD, Xue Y, Mendez FL, Willems TF, Massaia A, Wilson Sayres MA, Ayub Q,  
180 McCarthy SA, Narechania A, Kashin S, et al (2016) Punctuated bursts in human male  
181 demography inferred from 1,244 worldwide Y-chromosome sequences. *Nature Genetics*
- 182 7. Moreno-Estrada A, Gravel S, Zakharia F, McCauley JL, Byrnes JK, Gignoux CR,  
183 Ortiz-Tello PA, Martínez RJ, Hedges DJ, Morris RW, et al (2013) Reconstructing the  
184 Population Genetic History of the Caribbean. *PLoS Genetics* 9:e1003925
- 185 8. Gravel S (2012) Population genetics models of local ancestry. *Genetics* 191:607-619

- 186 9. Mao X, Bigham AW, Mei R, Gutierrez G, Weiss KM, Brutsaert TD, Leon-Velarde F,  
187 Moore LG, Vargas E, McKeigue PM, et al (2007) A genomewide admixture mapping  
188 panel for Hispanic/Latino populations. *American journal of human genetics* 80:1171-  
189 1178
- 190 10. Lind JM, Hutcheson-Dilks HB, Williams SM, Moore JH, Essex M, Ruiz-Pesini E,  
191 Wallace DC, Tishkoff SA, O'Brien SJ, Smith MW (2007) Elevated male European and  
192 female African contributions to the genomes of African American individuals. *Human*  
193 *Genetics* 120:713-722
- 194 11. Bryc K, Auton A, Nelson MR, Oksenberg JR, Hauser SL, Williams S, Froment A,  
195 Bodo J, Wambebe C, Tishkoff SA, et al (2010) Genome-wide patterns of population  
196 structure and admixture in West Africans and African Americans. *Proceedings of the*  
197 *National Academy of Sciences of the United States of America* 107:786-791
- 198 12. Bryc K, Velez C, Karafet T, Moreno-Estrada A, Reynolds A, Auton A, Hammer M,  
199 Bustamante CD, Ostrer H (2010) Colloquium paper: genome-wide patterns of  
200 population structure and admixture among Hispanic/Latino populations. *Proceedings of*  
201 *the National Academy of Sciences of the United States of America* 107 Suppl :8954-  
202 8961
- 203 13. Bryc K, Durand EY, Macpherson JM, Reich D, Mountain JL (2015) The genetic  
204 ancestry of african americans, latinians, and european Americans across the United  
205 States. *American Journal of Human Genetics* 96:37-53
- 206 14. Beleza S, Campos J, Lopes J, Araújo II, Hoppfer Almada A, Correia e Silva A, Parra  
207 EJ, Rocha J (2012) The Admixture Structure and Genetic Variation of the Archipelago  
208 of Cape Verde and Its Implications for Admixture Mapping Studies. *PLoS ONE* 7:1-12

- 209 15. Marcheco-Teruel B, Parra EJ, Fuentes-Smith E, Salas A, Buttenschøn HN,  
210 Demontis D, Torres-Español M, Marín-Padrón LC, Gómez-Cabezas EJ, Alvarez-  
211 Iglesias V, et al (2014) Cuba: exploring the history of admixture and the genetic basis of  
212 pigmentation using autosomal and uniparental markers. PLoS genetics 10:e1004488
- 213 16. Shringarpure SS, Bustamante CD, Lange KL, Alexander DH (2016) Efficient  
214 analysis of large datasets and sex bias with ADMIXTURE. bioRxiv 1:1-10
- 215 17. McHugh C, Thornton TA, Brown L (2015) Detecting Heterogeneity in Population  
216 Structure Across the Genome in Admixed Populations. bioRxiv:031831
